# Supplementary material for: Isolation of Chalcomoracin as a Potential α-Glycosidase Inhibitor from Mulberry Leaves and Its Binding Mechanism
Source: MDPI journal article supplement (doi:10.3390/molecules27185742), 2022-09-06
Supplement: s1 [file s1]

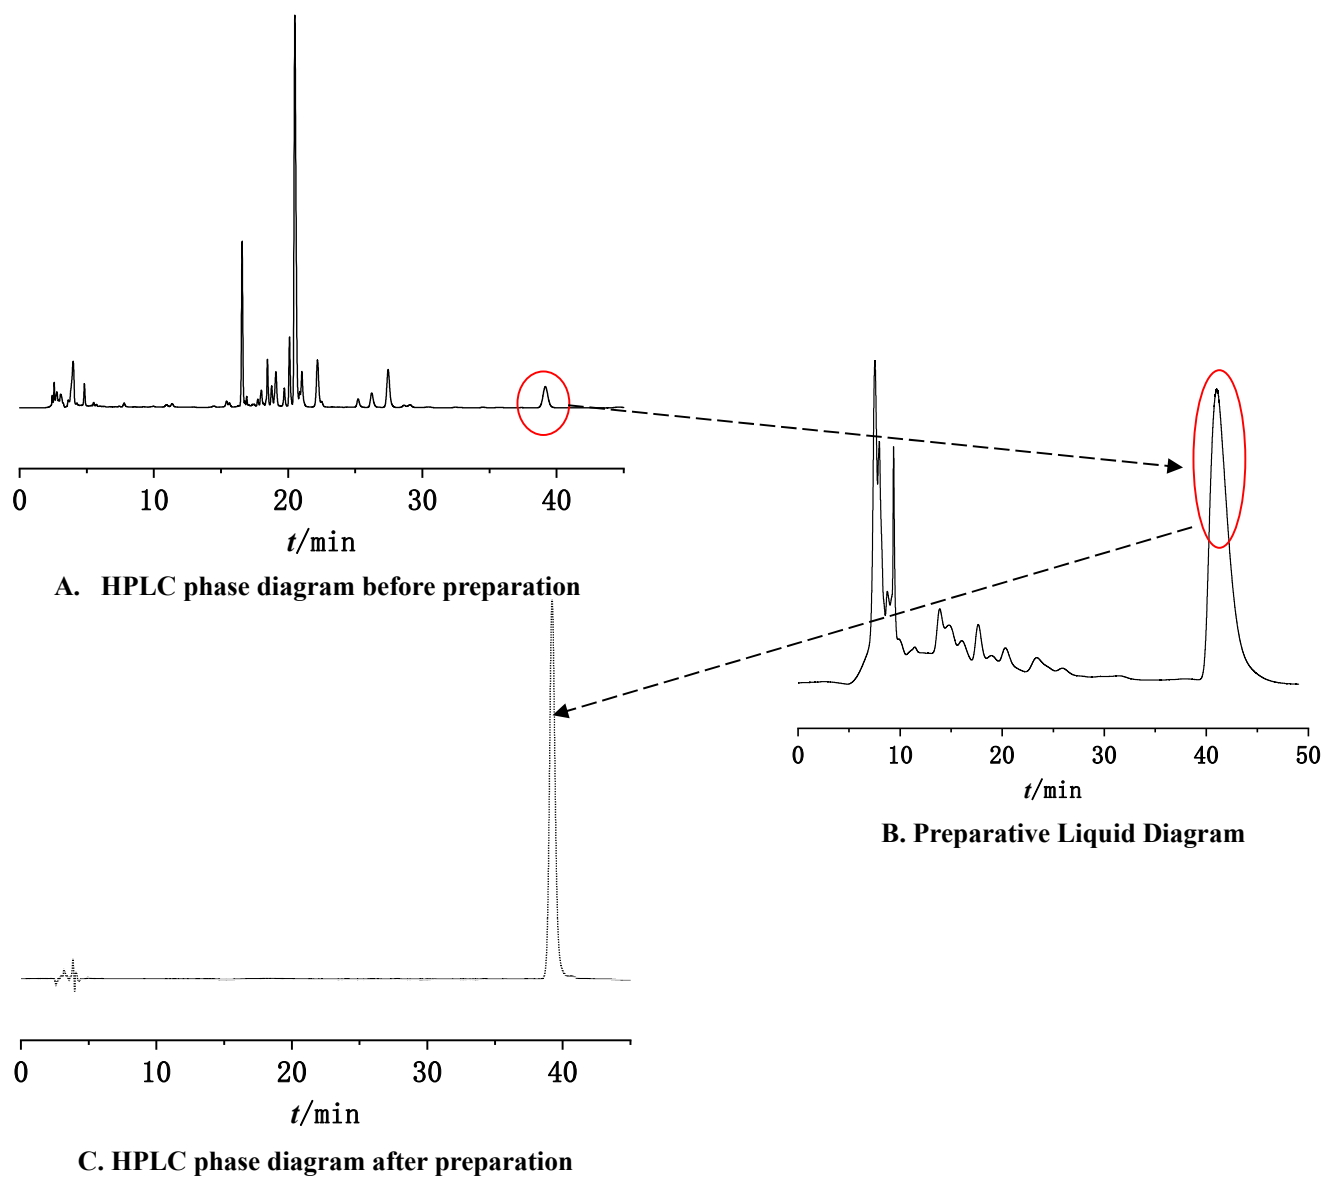

**Figure S1. Liquid phase diagram during chalcomoracin preparation.**

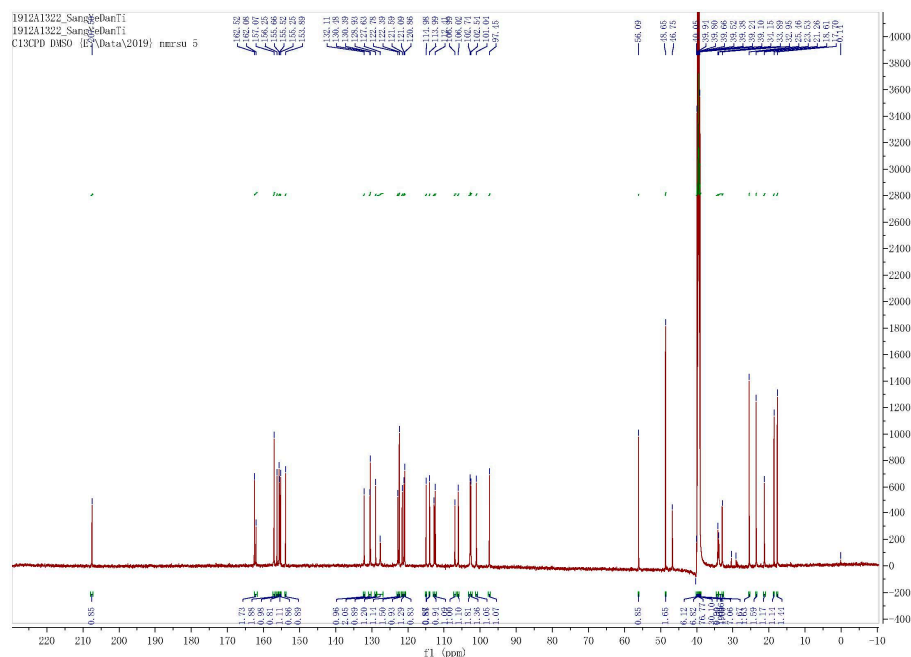

**A.  $^{13}\text{C}$ -NMR of chalconoracin.**

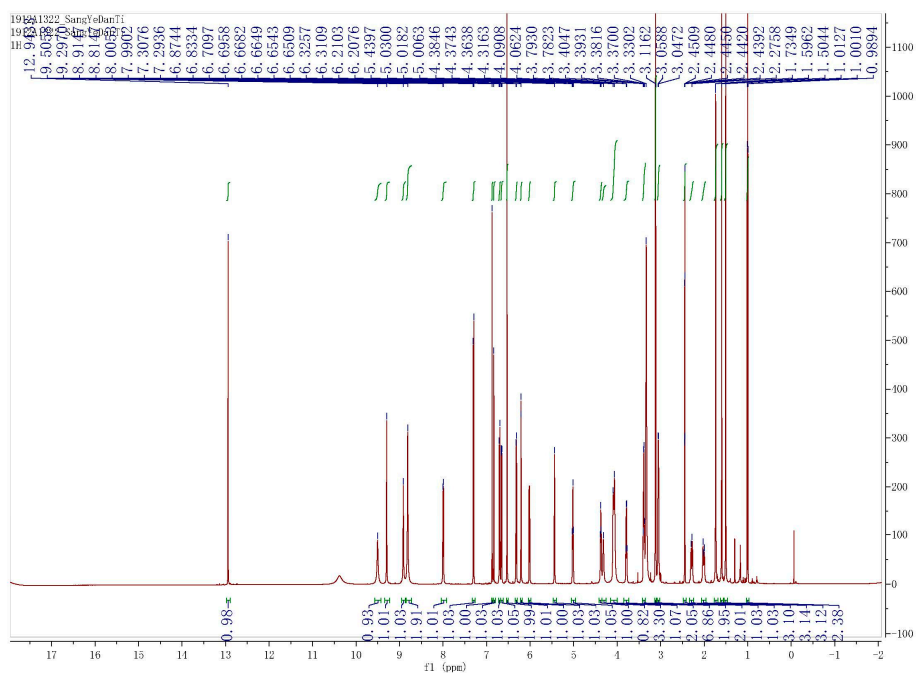

**B.  $^1\text{H}$ -NMR of chalconoracin.**

**Figure S2. NMR data of chalconoracin.**

**Table S1. Experimental protocol for inhibitory activity assay.**

| Reagent                         | Blank<br>(A1) | Control<br>(A2) | Sample blank<br>(A3) | Sample test<br>(A4) |
|---------------------------------|---------------|-----------------|----------------------|---------------------|
| PBS buffer (7.4)                | 60 $\mu$ L    | 30 $\mu$ L      | 30 $\mu$ L           | 0 $\mu$ L           |
| Inhibitor                       | 0 $\mu$ L     | 0 $\mu$ L       | 30 $\mu$ L           | 30 $\mu$ L          |
| $\alpha$ -Glucosidase           | 0 $\mu$ L     | 30 $\mu$ L      | 0 $\mu$ L            | 30 $\mu$ L          |
| PNPG                            | 50 $\mu$ L    | 50 $\mu$ L      | 50 $\mu$ L           | 50 $\mu$ L          |
| Na <sub>2</sub> CO <sub>3</sub> | 150 $\mu$ L   | 150 $\mu$ L     | 150 $\mu$ L          | 150 $\mu$ L         |

**Table S2. The molecular interactions between chalconoracin and  $\alpha$ -glycosidase**

| Receptor |     | Interaction | Distance ( $\text{\AA}$ ) |
|----------|-----|-------------|---------------------------|
| VAL-544  | N   | H-acceptor  | 3.60                      |
| ASP-95   | O   | H-donor     | 3.43                      |
| ALA-93   | O   | H-donor     | 2.99                      |
| GLY-119  | O   | H-donor     | 2.76                      |
| ARG-275  | NH1 | H-acceptor  | 2.94                      |
| ARG-275  | NH2 | H-acceptor  | 3.32                      |
| ARG-275  | NH2 | Pi-cation   | 5.71                      |
| PRO-287  | O   | H-donor     | 3.03                      |
